# Supplementary material for: Characterization of a Novel Megalocytivirus Isolated from European Chub (Squalius cephalus)
Source: PubMed Central journal article supplement (PMC6563503; doi:10.3390/v11050440), 2019-05-15
Supplement: viruses-11-00440-s001.pdf [file viruses-11-00440-s001.pdf]

**Table S1.** Genome annotation of the European chub iridovirus.

| ORF | Position<br>(nt range) | Product<br>(AA) | size | Predicted function and conserved<br>domain or signature | Best BLASTP hit <sup>a</sup>                                                  |           |               |
|-----|------------------------|-----------------|------|---------------------------------------------------------|-------------------------------------------------------------------------------|-----------|---------------|
|     |                        |                 |      |                                                         | Description                                                                   | E-value   | Accession no. |
| 1   | 1-1,125                | 374             |      | Transmembrane amino acid transporter protein            | ORF_082R [Scale drop disease virus]                                           | 4.10E-166 | YP_009163843  |
| 2   | 1,792-2,103            | 103             |      | Hypothetical protein                                    |                                                                               |           |               |
| 3   | 2,247-3,512            | 421             |      | Ankyrin repeat-containing protein                       | ORF_083L [Scale drop disease virus]                                           | 1.73E-116 | YP_009163844  |
| 4   | 3,399-4,328            | 309             |      | Ankyrin repeat-containing protein                       | ORF_084R [Scale drop disease virus]                                           | 1.01E-128 | YP_009163845  |
| 5   | 4,304-4,696            | 130             |      | Hypothetical protein                                    |                                                                               |           |               |
| 6   | 4,774-6,267            | 497             |      | mRNA capping enzyme                                     | putative RNA guanylytransferase [Infectious spleen and kidney necrosis virus] | 9.84E-145 | NP_612286     |
| 7   | 6,280-6,909            | 209             |      | Thymidylate kinase                                      | ORF_089L [Scale drop disease virus]                                           | 3.30E-35  | YP_009163850  |
| 8   | 7,117-7,587            | 156             |      | Hypothetical protein                                    | hypothetical protein [South American cichlid iridovirus]                      | 7.00E-10  | AVR29722      |
| 9   | 7,928-8635             | 235             |      | Src homology 2 (SH2) domain-containing protein          | ORF_117L [Scale drop disease virus]                                           | 1.86E-08  | YP_009163878  |
| 10  | 8,987-9,760            | 257             |      | Ribonuclease III                                        | ORF_025R [Scale drop disease virus]                                           | 4.54E-130 | YP_009163786  |
| 11  | 9,776-10,213           | 145             |      | Hypothetical product                                    | ORF_024R [Scale drop disease virus]                                           | 2.20E-70  | YP_009163785  |
| 12  | 10,220-10,762          | 180             |      | Hypothetical protein                                    | ORF_023R [Scale drop disease virus]                                           | 3.92E-29  | YP_009163784  |
| 13  | 10,858-11,235          | 125             |      | Hypothetical protein                                    | ORF_021L [Scale drop disease virus]                                           | 5.46E-26  | YP_009163782  |

Table S1. Continued.

| ORF | Position<br>(nt range) | Product size<br>(AA) | Predicted function and<br>conserved domain or signature      | Best BLAST hit <sup>a</sup>         |           |               |
|-----|------------------------|----------------------|--------------------------------------------------------------|-------------------------------------|-----------|---------------|
|     |                        |                      |                                                              | Description                         | E-value   | Accession no. |
| 14  | 11,281-11,568          | 95                   | Hypothetical protein                                         | ORF_019L [Scale drop disease virus] | 3.42E-38  | YP_009163780  |
| 15  | 11,630-12,970          | 446                  | Hypothetical protein                                         | ORF_072R [Scale drop disease virus] | 4.82E-21  | YP_009163833  |
| 16  | 12,980-13,555          | 191                  | Short chain dehydrogenase                                    | ORF_071R [Scale drop disease virus] | 5.15E-79  | YP_009163832  |
| 17  | 13,552-16,491          | 979                  | DNA polymerase family B                                      | ORF_070R [Scale drop disease virus] | 0         | YP_009163831  |
| 18  | 17,113-17,412          | 99                   | Hypothetical protein                                         |                                     |           |               |
| 19  | 17,427-18,056          | 209                  | Hypothetical protein                                         | ORF_069L [Scale drop disease virus] | 8.38E-86  | YP_009163830  |
| 20  | 18,059-18,406          | 115                  | Hypothetical protein                                         | ORF_119R [Scale drop disease virus] | 3.48E-48  | YP_009163880  |
| 21  | 18,440-19,240          | 266                  | Hypothetical protein                                         | ORF_118L [Scale drop disease virus] | 8.77E-54  | YP_009163879  |
| 22  | 19,304-22,435          | 1043                 | DNA-dependent RNA<br>polymerase II second largest<br>subunit | ORF_122L [Scale drop disease virus] | 0         | YP_009163883  |
| 23  | 23,065-24,636          | 523                  | Myristylated membrane<br>protein                             | ORF_061L [Scale drop disease virus] | 0         | YP_009163822  |
| 24  | 24,675-26,084          | 469                  | Hypothetical protein                                         | ORF_062R [Scale drop disease virus] | 3.78E-93  | YP_009163823  |
| 25  | 26,604-27,050          | 136                  | Hypothetical protein                                         | ORF_063L [Scale drop disease virus] | 6.39E-33  | YP_009163824  |
| 26  | 27,351-27,665          | 104                  | RING E3 ubiquitin ligase                                     | ORF_064R [Scale drop disease virus] | 3.44E-37  | YP_009163825  |
| 27  | 27,761-29,290          | 509                  | Serine/threonine<br>kinase                                   | ORF_065R [Scale drop disease virus] | 5.56E-164 | YP_009163826  |

Table S1. Continued.

| ORF | Position<br>(nt range) | Product size<br>(AA) | Predicted function and conserved domain or signature | Best BLAST hit <sup>a</sup>                                           |           |               |
|-----|------------------------|----------------------|------------------------------------------------------|-----------------------------------------------------------------------|-----------|---------------|
|     |                        |                      |                                                      | Description                                                           | E-value   | Accession no. |
| 28  | 29,352-29,678          | 108                  | Hypothetical protein                                 | ORF_066L [Scale drop disease virus]                                   | 9.29E-36  | YP_009163827  |
| 29  | 29,699-31,576          | 625                  | Macro domain-containing protein                      | ORF_067R [Scale drop disease virus]                                   | 0         | YP_009163828  |
| 30  | 31,586-32,428          | 280                  | IKI3 family protein                                  | ORF_068R [Scale drop disease virus]                                   | 4.28E-127 | YP_009163829  |
| 31  | 32,611-33,624          | 337                  | Serpin (serine protease inhibitor)                   | ORF_097L [Scale drop disease virus]                                   | 2.92E-71  | YP_009163858  |
| 32  | 33,711-34,373          | 220                  | Hypothetical protein                                 | ORF_075R [Scale drop disease virus]                                   | 3.99E-118 | YP_009163836  |
| 33  | 34,709-35,614          | 301                  | Hypothetical protein                                 | 062L [Cherax quadricarinatus iridovirus]                              | 2.50E-13  | ASZ85042      |
| 34  | 36,131-36,550          | 139                  | SAP domain-containing protein                        | ORF_027L [Scale drop disease virus]                                   | 2.10E-63  | YP_009163788  |
| 35  | 36,571-37,101          | 176                  | Macro domain-containing protein                      | PREDICTED: O-acetyl-ADP-ribose deacetylase 1 [Nothobranchius furzeri] | 2.67E-60  | XP_015823954  |
| 36  | 37,175-38,845          | 556                  | Hypothetical protein                                 | ORF_028R [Scale drop disease virus]                                   | 0         | YP_009163789  |
| 37  | 38,894-39,520          | 208                  | Hypothetical protein                                 | ORF_054R [Scale drop disease virus]                                   | 1.08E-11  | YP_009163815  |
| 38  | 29,676-41,655          | 659                  | Hypothetical protein                                 | ORF_128R [Scale drop disease virus]                                   | 6.66E-68  | YP_009163889  |
| 39  | 41,661-43,334          | 557                  | Hypothetical protein                                 | ORF_127R [Scale drop disease virus]                                   | 1.35E-134 | YP_009163888  |
| 40  | 43,382-43,615          | 77                   | Hypothetical protein                                 | ORF_126R [Scale drop disease virus]                                   | 2.40E-29  | YP_009163887  |
| 41  | 44,385-45,743          | 452                  | Major capsid protein                                 | ORF_060L [Scale drop disease virus]                                   | 0         | YP_009163821  |

Table S1. Continued.

| ORF | Position<br>(nt range) | Product size<br>(AA) | Predicted function and conserved domain or signature | Best BLAST hit <sup>a</sup>                                                   |           |               |
|-----|------------------------|----------------------|------------------------------------------------------|-------------------------------------------------------------------------------|-----------|---------------|
|     |                        |                      |                                                      | Description                                                                   | E-value   | Accession no. |
| 42  | 47,071-47,508          | 145                  | Hypothetical protein                                 | ORF_110R [Scale drop disease virus]                                           | 2.10E-47  | YP_009163871  |
| 43  | 47,581-47,940          | 119                  | Hypothetical protein                                 | ORF_058R [Scale drop disease virus]                                           | 3.34E-27  | YP_009163819  |
| 44  | 47,947-49,368          | 473                  | Ankyrin repeat-containing protein                    | ORF_108R [Scale drop disease virus]                                           | 8.73E-104 | YP_009163869  |
| 45  | 49,385-49,918          | 177                  | Hypothetical protein                                 | hypothetical protein [Pompano iridovirus]                                     | 5.22E-52  | AZQ20780      |
| 46  | 49,964-51,400          | 478                  | Ankyrin repeat-containing protein                    | ORF_107L [Scale drop disease virus]                                           | 5.49E-70  | YP_009163868  |
| 47  | 51,653-53,059          | 468                  | Ankyrin repeat-containing protein                    | ORF_116R [Scale drop disease virus]                                           | 4.45E-60  | YP_009163877  |
| 48  | 53,570-54,124          | 184                  | Hypothetical protein                                 | hypothetical protein LCDV1gp087 [Lymphocystis disease virus 1]                | 1.86E-04  | NP_078741     |
| 49  | 54,277-54,615          | 112                  | HIRAN domain-containing protein                      | hypothetical protein K493DRAFT_308693 [Basidiobolus meristosporus CBS 931.73] | 5.67E-09  | ORX78499      |
| 50  | 54,662-55,636          | 324                  | Proteasome accessory factor (PafA2)                  | ORF_031L [Scale drop disease virus]                                           | 1.12E-97  | YP_009163792  |
| 51  | 55,790-56,881          | 363                  | Hypothetical protein                                 | ORF_030L [Scale drop disease virus]                                           | 2.12E-157 | YP_009163791  |
| 52  | 56,884-57,417          | 177                  | Hypothetical protein                                 | ORF_029L [Scale drop disease virus]                                           | 1.01E-57  | YP_009163790  |
| 53  | 57,527-58,447          | 306                  | Hypothetical protein                                 | ORF_055R [Scale drop disease virus]                                           | 6.15E-79  | YP_009163816  |

Table S1. Continued.

| ORF | Position<br>(nt range) | Product size<br>(AA) | Predicted function and<br>conserved domain or signature | Best BLAST hit <sup>a</sup>                                                 |           |               |
|-----|------------------------|----------------------|---------------------------------------------------------|-----------------------------------------------------------------------------|-----------|---------------|
|     |                        |                      |                                                         | Description                                                                 | E-value   | Accession no. |
| 54  | 58,582-59,580          | 332                  | Ribonucleotide reductase beta subunit                   | ribonucleoside-diphosphate reductase subunit M2-like [Oncorhynchus kisutch] | 1.04E-177 | XP_020351890  |
| 55  | 59,967-60,746          | 259                  | Deoxyribonuclease 1                                     | deoxyribonuclease-1-like [Acanthochromis polyacanthus]                      | 5.49E-95  | XP_022075590  |
| 56  | 60,743-61,357          | 204                  | Hypothetical protein                                    | ORF_086R [Scale drop disease virus]                                         | 5.22E-59  | YP_009163847  |
| 57  | 62,124-63,071          | 315                  | Serpin (serine protease inhibitor)                      | ORF_045R [Scale drop disease virus]                                         | 5.69E-77  | YP_009163806  |
| 58  | 63,574-64,605          | 343                  | Hypothetical protein                                    |                                                                             |           |               |
| 59  | 64,984-70,611          | 1875                 | Hypothetical protein                                    | ORF_105L [Scale drop disease virus]                                         | 0         | YP_009163866  |
| 60  | 70,631-73,369          | 912                  | DEAD-like helicase                                      | ORF_104L [Scale drop disease virus]                                         | 0         | YP_009163865  |
| 61  | 73,898-74,617          | 239                  | RING E3 ubiquitin ligase                                | ORF_103L [Scale drop disease virus]                                         | 2.82E-10  | YP_009163864  |
| 62  | 74,655-74,972          | 105                  | RING E3 ubiquitin ligase                                | ORF_102L [Scale drop disease virus]                                         | 4.26E-45  | YP_009163863  |
| 63  | 74,891-75,322          | 143                  | Ankyrin repeat-containing protein                       | ORF_100L [Scale drop disease virus]                                         | 8.64E-40  | YP_009163861  |
| 64  | 75,327-75,890          | 187                  | NIF/NLI interacting factor                              | ORF_099L [Scale drop disease virus]                                         | 7.30E-95  | YP_009163860  |
| 65  | 76,300-77,688          | 462                  | Hypothetical protein                                    |                                                                             |           |               |
| 66  | 77,695-79,245          | 516                  | Chromosome segregation protein                          |                                                                             |           |               |

Table S1. Continued.

| ORF | Position<br>(nt range) | Product size<br>(AA) | Predicted function and conserved domain or signature | Best BLAST hit <sup>a</sup>                                        |           |               |
|-----|------------------------|----------------------|------------------------------------------------------|--------------------------------------------------------------------|-----------|---------------|
|     |                        |                      |                                                      | Description                                                        | E-value   | Accession no. |
| 67  | 79,473-80,582          | 369                  | Hypothetical protein                                 | ORF_002R [Scale drop disease virus]                                | 1.67E-53  | YP_009163763  |
| 68  | 81,271-81,627          | 118                  | Erv1/Alr family protein                              | ORF_003L [Scale drop disease virus]                                | 4.17E-66  | YP_009163764  |
| 69  | 81,631-83,097          | 488                  | Hypothetical protein                                 | ORF_004L [Scale drop disease virus]                                | 3.54E-70  | YP_009163765  |
| 70  | 83,111-84,664          | 517                  | Hypothetical protein                                 | ORF_005L [Scale drop disease virus]                                | 2.21E-59  | YP_009163766  |
| 71  | 84,657-85,352          | 231                  | Cytosine methyltransferase                           | DNA cytosine DNA methyltransferase [Three spot gourami iridovirus] | 1.77E-91  | AVR29817      |
| 72  | 85,931-86,302          | 123                  | Hypothetical protein                                 | ORF_010R [Scale drop disease virus]                                | 1.25E-46  | YP_009163771  |
| 73  | 86,299-86,694          | 131                  | Vascular endothelial growth factors                  | ORF_011R [Scale drop disease virus]                                | 1.12E-14  | YP_009163772  |
| 74  | 86,954-87,358          | 134                  | Bcl-2 family apoptosis regulator protein             | ORF_013L [Scale drop disease virus]                                | 1.69E-28  | YP_009163774  |
| 75  | 87,622-88,560          | 312                  | 2-cysteine adaptor domain-containing protein         | ORF_014L [Scale drop disease virus]                                | 9.82E-105 | YP_009163775  |
| 76  | 88,572-89,417          | 281                  | 2-cysteine adaptor domain-containing protein         | ORF_015L [Scale drop disease virus]                                | 4.28E-77  | YP_009163776  |
| 77  | 89,426-90,061          | 211                  | Hypothetical protein                                 | ORF_016L [Scale drop disease virus]                                | 8.91E-118 | YP_009163777  |
| 78  | 90,440-90,721          | 93                   | Hypothetical protein                                 | hypothetical protein ORF_099R [Red seabream iridovirus]            | 2.27E-09  | BAK14229      |
| 79  | 90,718-91,569          | 283                  | Transcription factor                                 | ORF_017L [Scale drop disease virus]                                | 5.21E-149 | YP_009163778  |

Table S1. Continued.

| ORF | Position<br>(nt range) | Product size<br>(AA) | Predicted function and<br>conserved domain or signature | Best BLAST hit <sup>a</sup>                           |           |               |
|-----|------------------------|----------------------|---------------------------------------------------------|-------------------------------------------------------|-----------|---------------|
|     |                        |                      |                                                         | Description                                           | E-value   | Accession no. |
| 80  | 91,580-92,371          | 263                  | Hypothetical protein                                    | ORF_018L [Scale drop disease virus]                   | 9.20E-91  | YP_009163779  |
| 81  | 92,373-94,754          | 793                  | Hypothetical protein                                    | ORF_018L [Scale drop disease virus]                   | 1.07E-129 | YP_009163779  |
| 82  | 95,308-95,658          | 116                  | Hypothetical protein                                    |                                                       |           |               |
| 83  | 95,663-96,217          | 184                  | Hypothetical protein                                    | ORF_059R [Scale drop disease virus]                   | 9.16E-13  | YP_009163820  |
| 84  | 96,473-96,709          | 78                   | Ubiquitin family protein                                | 40S ribosomal protein S27a<br>[Cyberlindnera jadinii] | 2.47E-41  | CEP23256      |
| 85  | 97,430-100,306         | 988                  | Hypothetical protein                                    | ORF_091L [Scale drop disease virus]                   | 0         | YP_009163852  |
| 86  | 100,334-100,831        | 165                  | Hypothetical protein                                    | ORF_092R [Scale drop disease virus]                   | 1.04E-51  | YP_009163853  |
| 87  | 100,837-101,337        | 166                  | Hypothetical protein                                    | ORF_093R [Scale drop disease virus]                   | 8.74E-47  | YP_009163854  |
| 88  | 101,374-102,555        | 393                  | Hypothetical protein                                    | ORF_094L [Scale drop disease virus]                   | 8.14E-150 | YP_009163855  |
| 89  | 102,845-103,927        | 354                  | Hypothetical protein                                    |                                                       |           |               |
| 90  | 104,437-107,211        | 924                  | D5 family NTPase                                        | ORF_040R [Scale drop disease virus]                   | 0         | YP_009163801  |
| 91  | 107,140-107,964        | 274                  | Proliferating cell nuclear<br>antigen                   | ORF_039L [Scale drop disease virus]                   | 6.23E-161 | YP_009163800  |
| 92  | 108,026-109,318        | 430                  | Ankyrin repeat-containing<br>protein                    | ORF_115R [Scale drop disease virus]                   | 2.45E-28  | YP_009163876  |
| 93  | 109,488-110,072        | 194                  | Hypothetical protein                                    | ORF_038R [Scale drop disease virus]                   | 1.47E-103 | YP_009163799  |

Table S1. Continued.

| ORF | Position<br>(nt range) | Product size<br>(AA) | Predicted function and<br>conserved domain or signature | Best BLAST hit <sup>a</sup>                                        |           |               |
|-----|------------------------|----------------------|---------------------------------------------------------|--------------------------------------------------------------------|-----------|---------------|
|     |                        |                      |                                                         | Description                                                        | E-value   | Accession no. |
| 94  | 110,026-112,656        | 876                  | Tyrosine kinase                                         | ORF_O37R [Scale drop disease virus]                                | 0         | YP_009163798  |
| 95  | 112,747-113,784        | 345                  | Immediate early protein ICP-46                          | ORF_036L [Scale drop disease virus]                                | 1.68E-153 | YP_009163797  |
| 96  | 113,790-114,512        | 240                  | ATPase                                                  | ORF_035L [Scale drop disease virus]                                | 1.83E-158 | YP_009163796  |
| 97  | 114,614-115,201        | 195                  | US22 protein                                            | uncharacterized protein LOC109953611 isoform X1 [Monopterus albus] | 1.38E-24  | XP_020444743  |
| 98  | 115,441-116,145        | 234                  | Hypothetical protein                                    | ORF_034R [Scale drop disease virus]                                | 2.06E-122 | YP_009163795  |
| 99  | 116,199-117,629        | 476                  | Ankyrin repeat-containing protein                       | ORF_116R [Scale drop disease virus]                                | 3.35E-51  | YP_009163877  |
| 100 | 117,681-118,499        | 272                  | Hypothetical protein                                    | ORF_033L [Scale drop disease virus]                                | 3.48E-103 | YP_009163794  |
| 101 | 118,506-119,699        | 397                  | Hypothetical protein                                    | ORF_032L [Scale drop disease virus]                                | 2.41E-119 | YP_009163793  |
| 102 | 119,855-121,282        | 475                  | Ankyrin repeat-containing protein                       | ORF_116R [Scale drop disease virus]                                | 1.34E-70  | YP_009163877  |
| 103 | 121,342-122,253        | 303                  | Flap endonuclease                                       | ORF_073L [Scale drop disease virus]                                | 9.10E-164 | YP_009163834  |
| 104 | 122,276-125,833        | 1185                 | DNA-dependent RNA polymerase II largest subunit         | ORF_076L [Scale drop disease virus]                                | 0         | YP_009163837  |
| 105 | 125,823-126,683        | 286                  | Hypothetical protein                                    | ORF_078L [Scale drop disease virus]                                | 1.22E-71  | YP_009163839  |
| 106 | 126,705-127,223        | 172                  | Hypothetical protein                                    | ORF_079R [Scale drop disease virus]                                | 2.48E-87  | YP_009163840  |



Table S1. Continued.

| ORF | Position<br>(nt range) | Product size<br>(AA) | Predicted function<br>and conserved domain or signature | Best BLAST hit <sup>a</sup> |        |      | E-value | Accession no. |              |
|-----|------------------------|----------------------|---------------------------------------------------------|-----------------------------|--------|------|---------|---------------|--------------|
|     |                        |                      |                                                         | Description                 |        |      |         |               |              |
| 107 | 127,232-<br>127,735    | 167                  | Hypothetical protein                                    | ORF_080R                    | [Scale | drop | disease | 7.32E-62      | YP_009163841 |
| 108 | 127,722-<br>128,210    | 162                  | Hypothetical protein                                    | ORF_081R                    | [Scale | drop | disease | 5.93E-50      | YP_009163842 |

<sup>a</sup>Significant hits based on NCBI BLASTP analyses

Abbreviations: nt, nucleotides; AA, amino acids
